# Supplementary material for: Brown adipose tissue CoQ deficiency activates the integrated stress response and FGF21-dependent mitohormesis
Source: PubMed Central journal article supplement (PMC10897314; doi:10.1038/s44318-023-00008-x), 2024-01-11
Supplement: 44318_2023_8_MOESM1_ESM.pdf [file 44318_2023_8_MOESM1_ESM.pdf]

# Appendix

## Table of Contents

### Supplementary Figures

**Appendix Figure S1: ATF4 induces components crucial in metabolic adaptation**

**by BAT CoQ-deficiency .....2-3**

**Appendix Figure S2: Characterizing FGF21 effects on BAT and peripheral tissues**

**.....4-5**

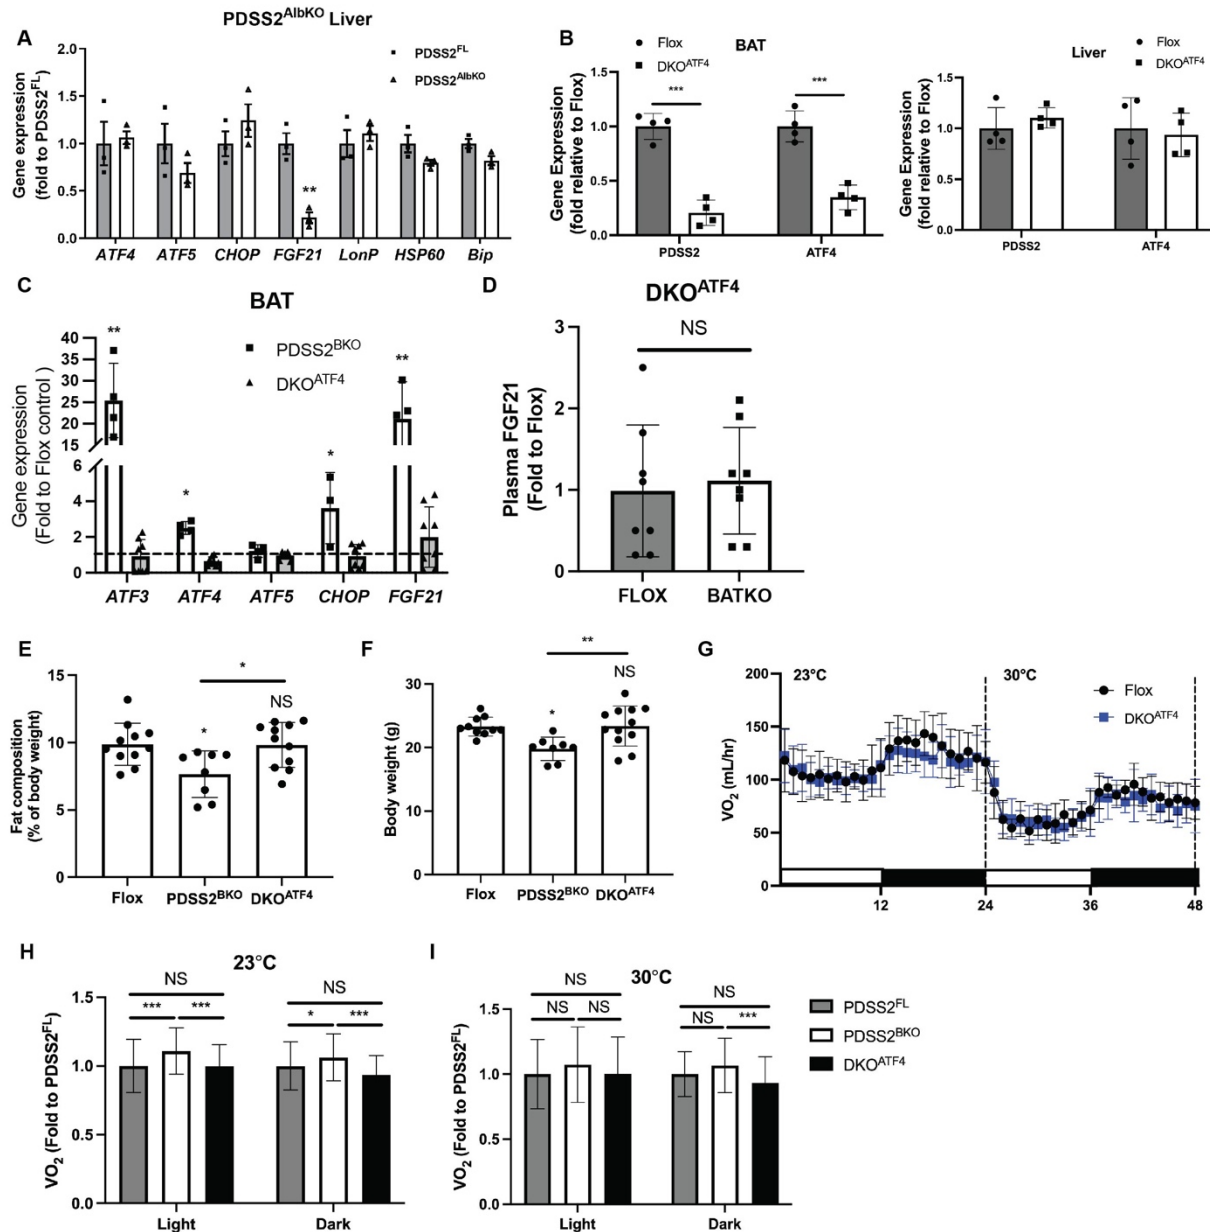

### Appendix Figure S1. ATF4 induces components crucial in metabolic adaptation by BAT CoQ-deficiency

A Stress-related gene expression in liver of PDSS2<sup>FL</sup> or liver-specific PDSS2 knockouts (PDSS2<sup>AlbKO</sup>), n=3.

B Validation of PDSS2 and ATF4 via qPCR analysis of BAT (left panel) and liver (right panel) of floxed controls (Flox) and BAT-specific PDSS2 and ATF4 double knockout animals (DKO<sup>ATF4</sup>) animals, n=4.

C ISR-related gene expression in BAT of PDSS2<sup>BKO</sup> and DKO<sup>ATF4</sup> mice, n=4-8.

D Plasma FGF21 levels of DKO<sup>ATF4</sup> compared to floxed controls, n=8.

E-F Body weight and fat composition of control Flox, PDSS2<sup>BKO</sup> and DKO<sup>ATF4</sup> after 2-week defined diet at age 10-week, n=8-11.

G Oxygen consumption rate of PDSS2<sup>FL</sup> and DKO<sup>ATF4</sup> animals was monitored under 23 and 30°C in real-time in metabolic cages using CLAMS, n=5.

H-I Averaged VO<sub>2</sub> of PDSS2<sup>FL</sup>, PDSS2<sup>BKO</sup> and DKO<sup>ATF4</sup> at 23 and 30°C, n=5-11.

Data information: Data are mean ± SEM. (A-D) Results were compared using an unpaired two-tailed student t test. (E-F, H-I) Results were compared using a one-way ANOVA test. Significance presented at P\* < 0.05, P\*\* < 0.01, and P\*\*\* < 0.001 compared to controls. Data describes biological replicates.

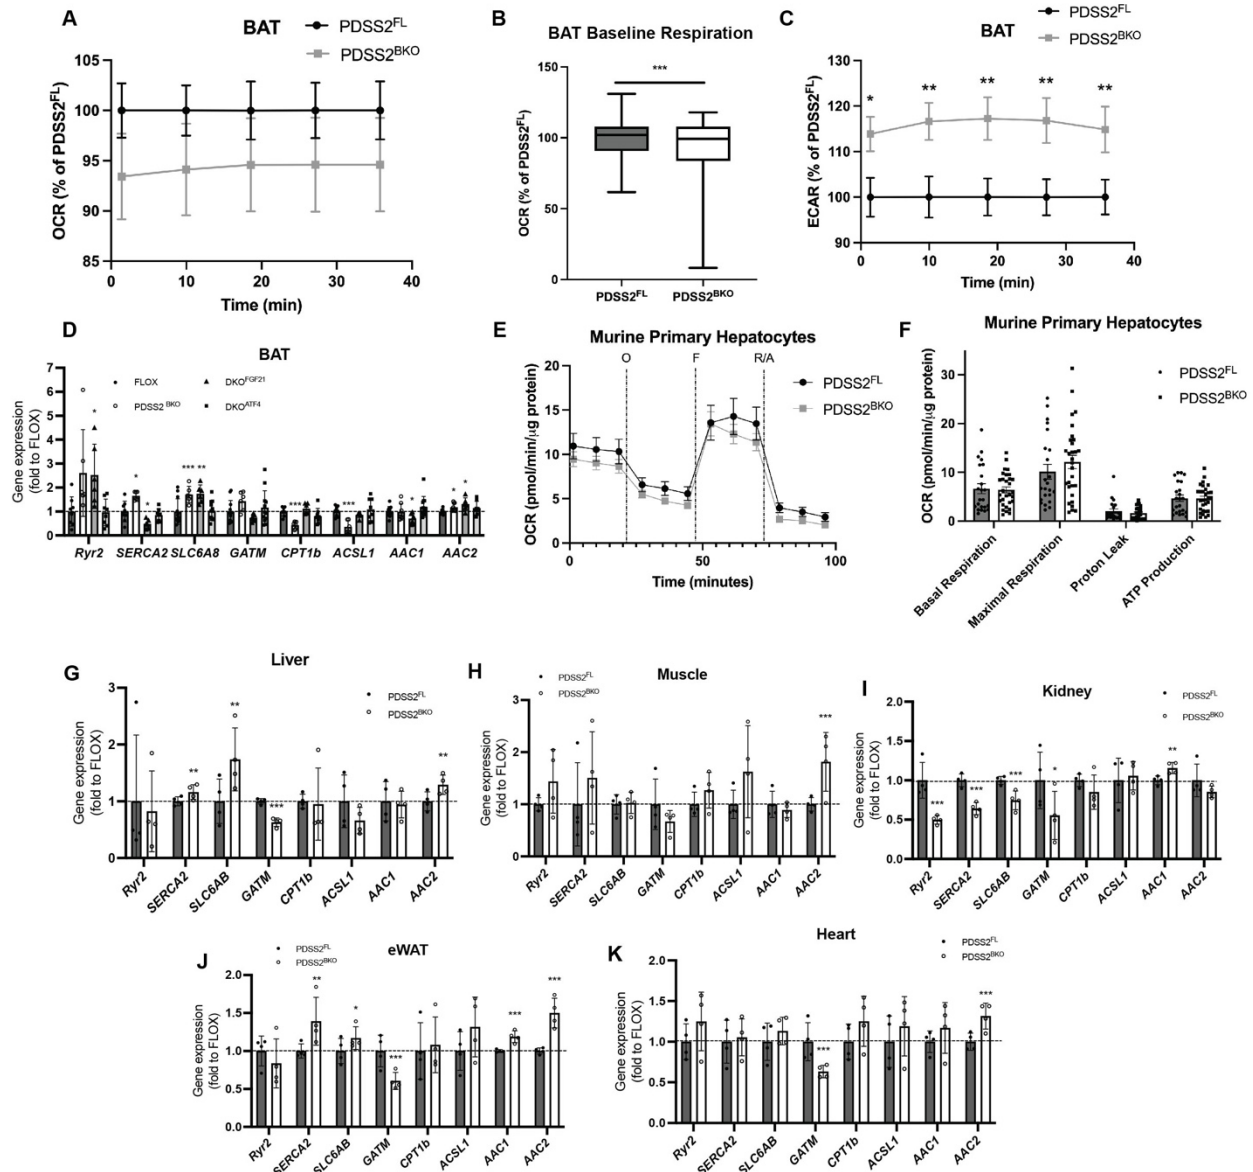

## Appendix Figure S2. Characterizing FGF21 effects on BAT and peripheral tissues

A OCR of BAT tissue pieces from PDSS2<sup>FL</sup> or PDSS2<sup>BKO</sup> mice. BAT was dissected from 5 mice per group with 5 tissue pieces analyzed per mouse for a total of 25 tissue pieces analyzed per group.

B Baseline respiration of BAT tissue pieces. Data from the 5 timepoints from the OCR trace in A were pooled and compared between PDSS2<sup>FL</sup> or PDSS2<sup>BKO</sup> BAT pieces. Centerline represents median and box extends from 25<sup>th</sup> to 75<sup>th</sup> percentiles. BAT was dissected from 5 mice per group with 5 tissue pieces analyzed per mouse for a total of 25 tissue pieces analyzed per group.

C Extracellular acidification rate (ECAR) of BAT tissue pieces from PDSS2<sup>FL</sup> or PDSS2<sup>BKO</sup> mice. BAT was dissected from 5 mice per group with 5 tissue pieces analyzed per mouse for a total of 25 tissue pieces analyzed per group.

D Genes of UCP1-independent thermogenesis in BAT of BAT-specific PDSS2, ATF4 and PDSS2, or FGF21 and PDSS2 knockouts (PDSS2<sup>BKO</sup>, DKO<sup>ATF4</sup> and DKO<sup>FGF21</sup>), n=6-8/group.

E OCR of murine primary hepatocytes isolated from PDSS2<sup>FL</sup> or PDSS2<sup>BKO</sup> mice. Hepatocytes were isolated from 3 mice per group and plated in 5-10 wells per mouse.

F Basal, maximal, proton leak and ATP production respiration of primary hepatocytes isolated from PDSS2<sup>FL</sup> or PDSS2<sup>BKO</sup> mice, n=3 mice/group.

G-K Genes of UCP1-independent thermogenesis in liver, muscle, kidney, eWAT or heart of PDSS2<sup>FL</sup> and PDSS2<sup>BKO</sup> animals, n=4.

Data information: All data except panel B are mean  $\pm$  SEM. Results were compared using an unpaired two-tailed student t test. Significance presented at P\* $<$ 0.05, P\*\* $<$ 0.01, and P\*\*\* $<$ 0.001 compared to controls. Data describes biological replicates.
