# Supplementary material for: Brown adipose tissue CoQ deficiency activates the integrated stress response and FGF21-dependent mitohormesis
Source: PubMed Central journal article supplement (PMC10897314; doi:10.1038/s44318-023-00008-x), 2024-01-11
Supplement: 44318_2023_8_MOESM11_ESM.pdf [file 44318_2023_8_MOESM11_ESM.pdf]

# Expanded View Figures

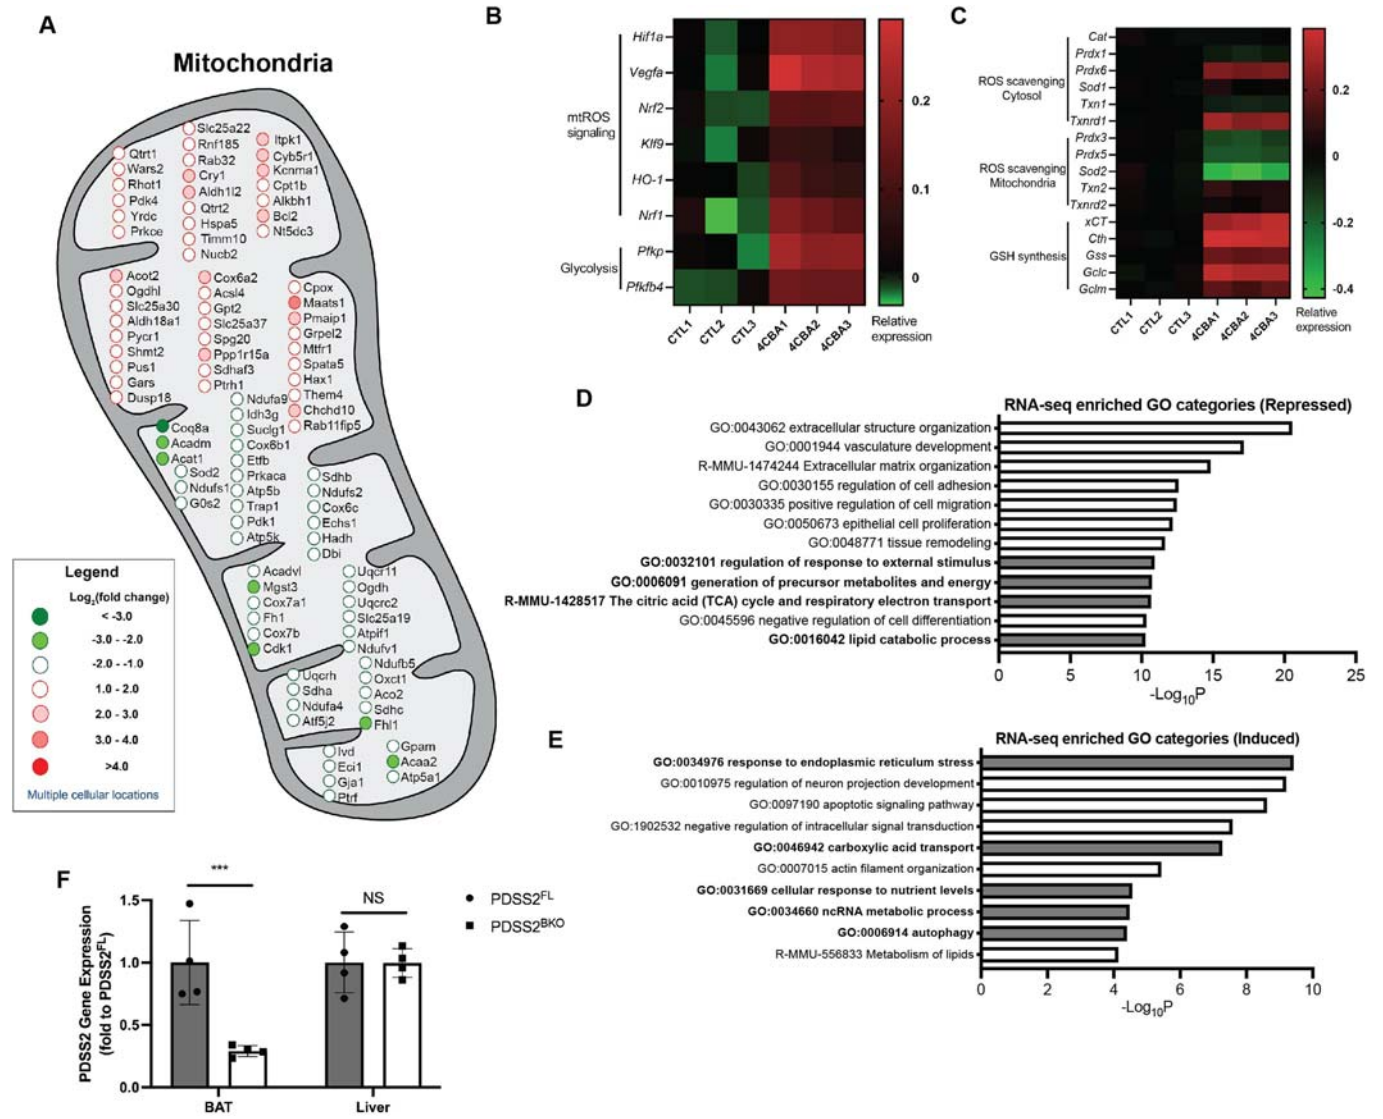

**Figure EV1. Enriched genes and pathways in CoQ deficient murine brown adipocytes.**

(A) Top 50 upregulated and top 50 downregulated mitochondrial genes from RNA sequencing results with  $p$  value  $\leq 0.00418062$ . (B, C) Relative expression ( $\log_{10}$ -transformed RPKM value) of enriched genes in murine brown adipocytes treated with 4CBA (24 h). (D, E) Gene Ontology (GO) analysis of RNAseq data from 24-h 4CBA treated brown adipocytes. Representative GO categories repressed or induced. (F) Validation of tissue specific knockout of PDSS2 via qPCR analysis in BAT and liver of PDSS2 floxed (PDSS2<sup>FL</sup>) or BAT-specific PDSS2 knockout (PDSS2<sup>BKO</sup>) animals,  $n = 4$ . Results were compared using an unpaired two-tailed Student's  $t$  test. Significance presented at \*\*\* $P < 0.001$  compared to controls. Data describes biological replicates. Data information: (A, D, E) The Wald test was used for statistical analysis.

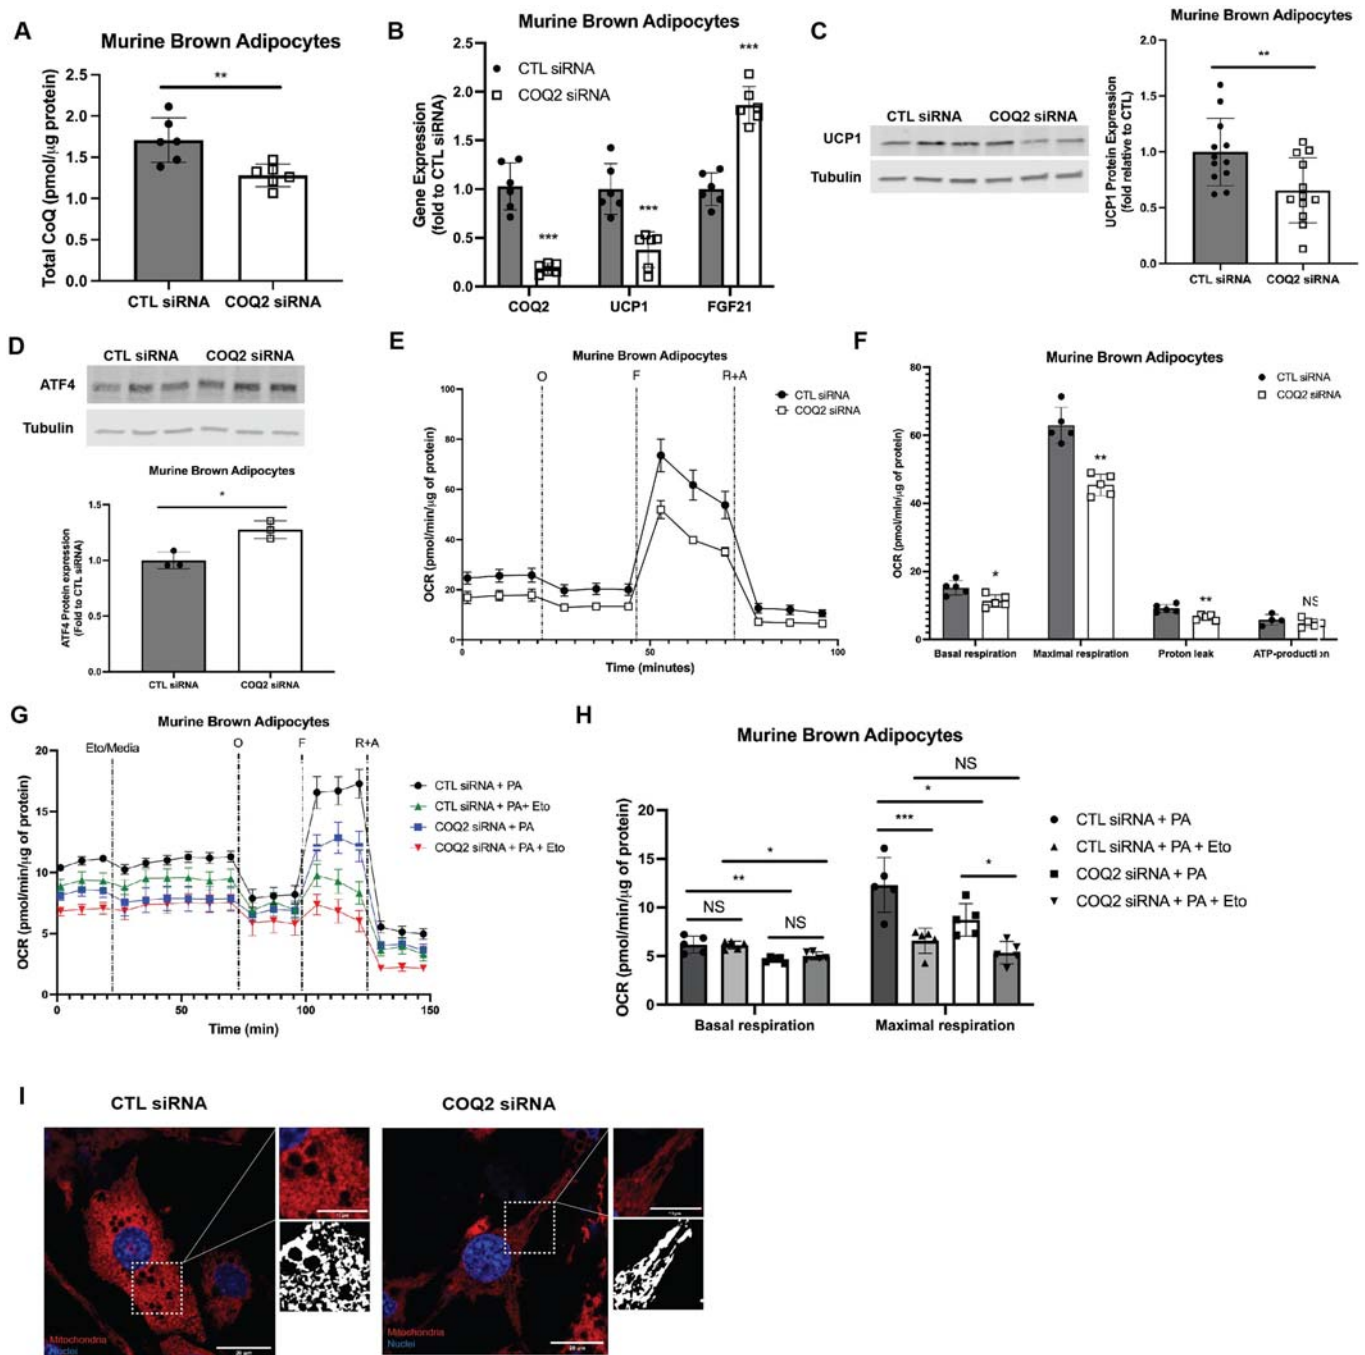

**Figure EV2. Genetically induced CoQ deficiency in murine brown adipocytes via knockdown of COQ2.**

(A) Total CoQ levels, including CoQ<sub>9</sub> and CoQ<sub>10</sub> isoforms, of murine brown adipocytes transfected with either a scramble siRNA (CTL siRNA) or COQ2 siRNA,  $n = 6$ . (B) Gene expression of CTL siRNA and COQ2 siRNA treated cells,  $n = 5$ . (C) UCP1 protein expression of CTL siRNA and COQ2 siRNA treated cells,  $n = 12$ . (D) ATF4 protein expression of CTL siRNA and COQ2 siRNA treated cells,  $n = 3$ . (E) Oxygen consumption rate (OCR) of CTL siRNA and COQ2 siRNA treated cells during mitochondrial stress test,  $n = 5$ . (F) Basal, maximal, protein leak and ATP production respiration of CTL siRNA and COQ2 siRNA treated cells calculated from oxygen trace shown in (E),  $n = 5$ . (G) Fatty acid oxidation assay was performed on cells treated with CTL siRNA + palmitate (PA), CTL siRNA + PA + Etomoxir (Eto), COQ2 siRNA + PA and COQ2 siRNA + PA + Eto and OCR was measured,  $n = 5$ . (H) Basal and maximal respiration of the same cells whose oxygen trace is shown in (E),  $n = 5$ . Results were compared using a one-way ANOVA test. (I) Brown adipocytes with CTL siRNA or COQ2 siRNA treatment were stained with MitoTracker deep red, and dapi and visualized using the Zeiss LSM880, scale bar = 20 μm. Data information: Data are mean ± SEM. (A–D, F) Results were compared using an unpaired two-tailed Student's *t* test. Significance presented at \* $P < 0.05$ , \*\* $P < 0.01$ , and \*\*\* $P < 0.001$  compared to controls. Data describes biological replicates.

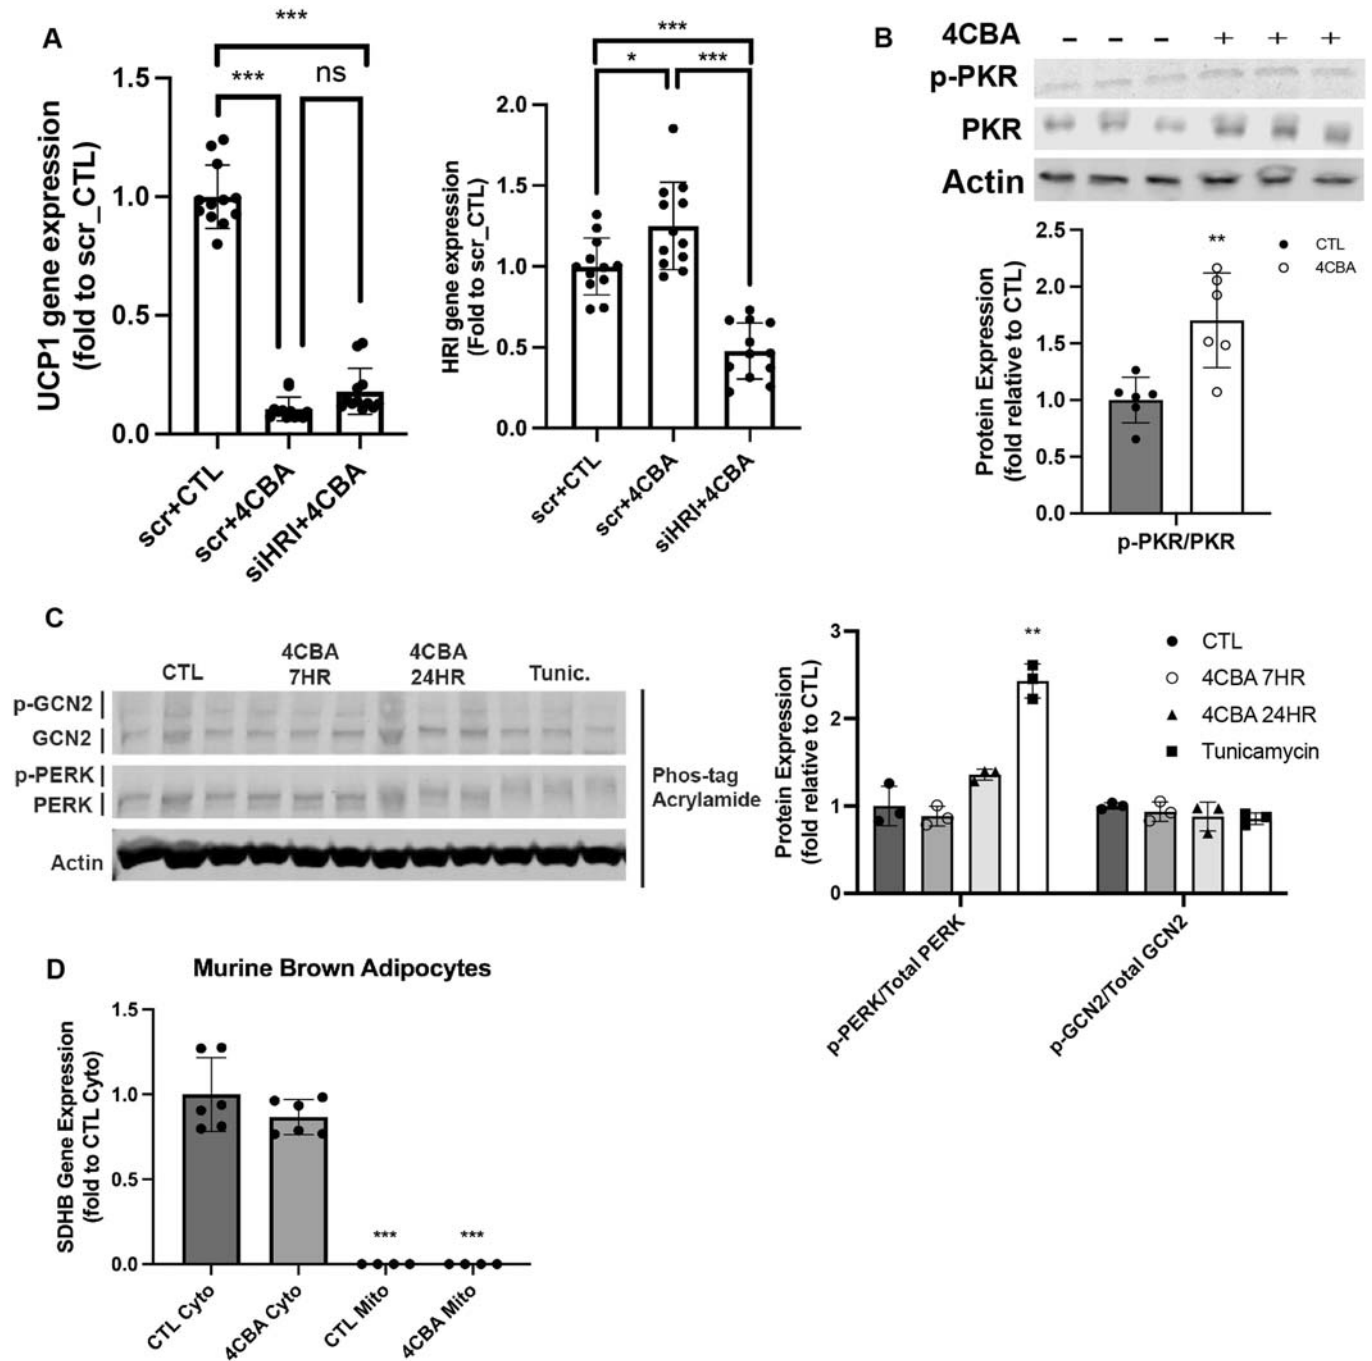

**Figure EV3. Targeting stress kinases to study ISR induction.**

(A) *UCP1* and *HRI* gene expression in brown adipocytes transfected with scramble or HRI siRNA under vehicle control or 4CBA treatment for 24 h,  $n = 12$ . Pooled data for three repeated experiments. Results were compared using a one-way ANOVA test. (B) Western blot analysis of PKR and phosphorylated PKR (Thr451) levels,  $n = 6$ . (C) Phos-tag gel analysis of p-GCN2 and p-PERK compared to total GCN2 and total PERK,  $n = 3$ . (D) SDHB gene expression of cytosolic or mitochondrial cell fractions from vehicle or 4CBA-treated cells,  $n = 4-6$ . Data information: Data are mean  $\pm$  SEM. (B-D) Results were compared using an unpaired two-tailed Student's *t* test. Significance presented at \* $P < 0.05$ , \*\* $P < 0.01$ , and \*\*\* $P < 0.001$  compared to controls. Data describes biological replicates.

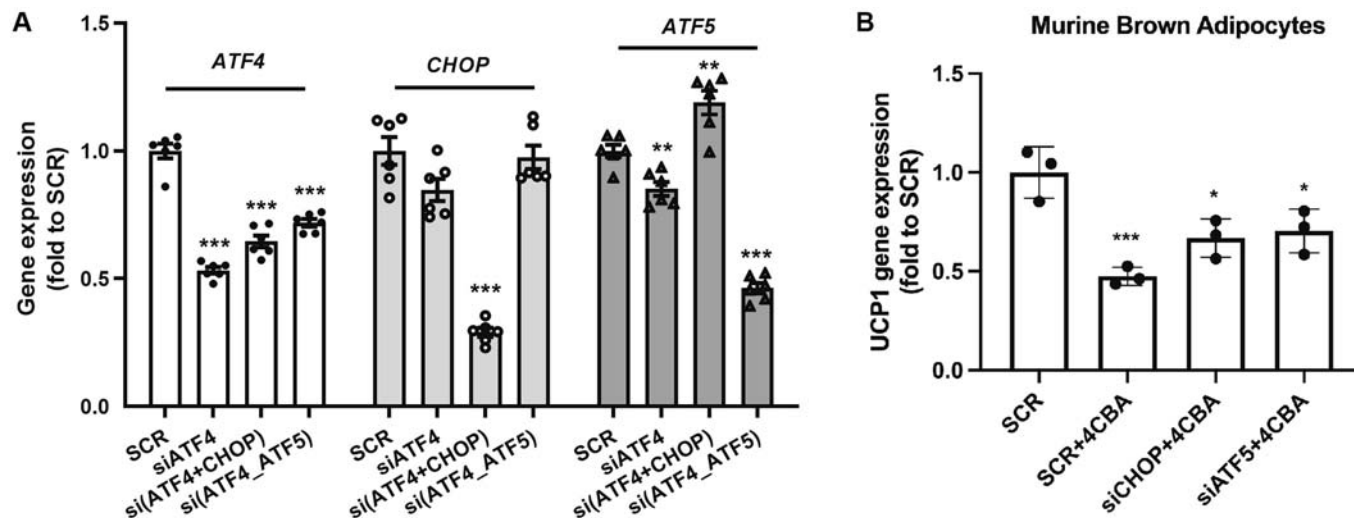

**Figure EV4. Targeting ISR-related components.**

(A) *ATF4*, *CHOP*, and *ATF5* expression in brown adipocytes with 4CBA treatment after indicated siRNA knockdown of target genes (*x*-axis),  $n = 6$ . Results were compared using an unpaired two-tailed Student's *t* test. (B) *UCP1* expression in 4CBA-treated brown adipocyte with siRNA-mediated knockdown of *CHOP* or *ATF5*,  $n = 3$ . Results were compared using a one-way ANOVA test. Data information: Data are mean  $\pm$  SEM. Significance presented at \* $P < 0.05$ , \*\* $P < 0.01$ , and \*\*\* $P < 0.001$  compared to controls. Data describes biological replicates.

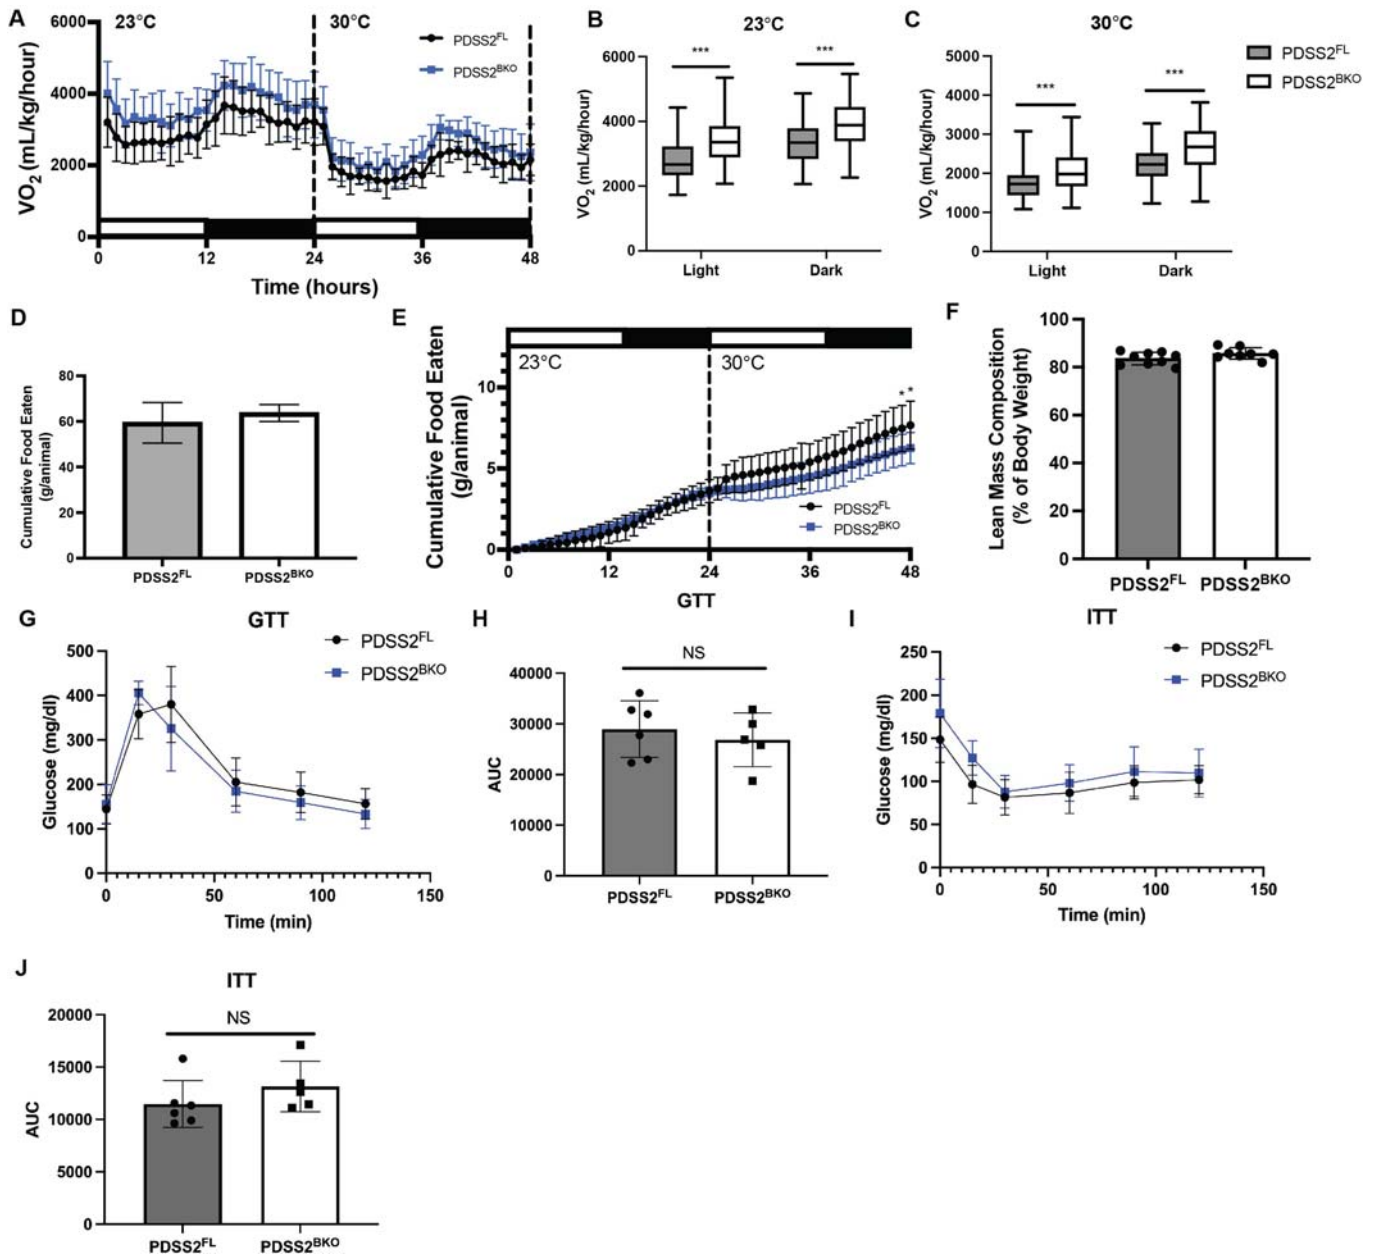

**Figure EV5. Metabolic parameters of PDSS2 knockouts.**

(A) Oxygen consumption rate of PDSS2<sup>FL</sup> or PDSS2<sup>BKO</sup> animals was monitored under 23 and 30 °C in real-time in metabolic cages using CLAMS. Data normalized to body weight. (B, C) Averaged oxygen consumption rate. Centerline represents median and box extends from 25th to 75th percentiles. Data normalized to body weight. (D) Food consumption accumulated in three weeks. (E) Real-time feeding data from metabolic cage run at 23 and 30 °C. (F) Lean mass composition of PDSS2<sup>FL</sup> and PDSS2<sup>BKO</sup> animals. (G) Glucose tolerance test (GTT) of PDSS2<sup>FL</sup> and PDSS2<sup>BKO</sup> animals. 2.0 g/kg body weight glucose dose administered via intraperitoneal (IP) injection. (H) Area under curve (AUC) analysis of GTT presented in (G). (I) Insulin tolerance test (ITT) of PDSS2<sup>FL</sup> and PDSS2<sup>BKO</sup> animals. 0.4 IU/kg body weight insulin dose administered via IP injection. (J) Area under curve (AUC) analysis of ITT presented in (I). Data information. (A–C)  $n = 10\text{--}11/\text{group}$ . (D–F)  $n = 8\text{--}9/\text{group}$ . (G–J)  $n = 5\text{--}6/\text{group}$ . Data are mean  $\pm$  SEM. Results were compared using an unpaired two-tailed Student's  $t$  test. Significance presented at \* $P < 0.05$ , and \*\*\* $P < 0.001$  compared to controls. Data describes biological replicates.
